# Supplementary material
Source: ML conference proceedings conference paper supplement (https://openreview.net/forum?id=H9MvL8o5gc)

MAP

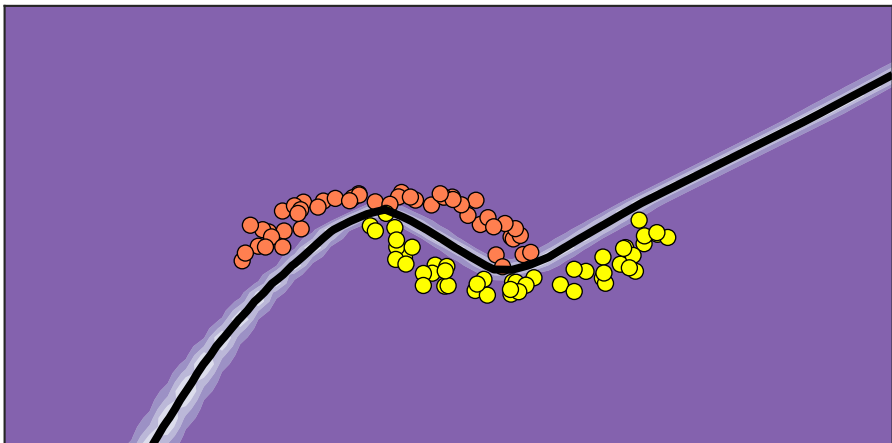

Diag.-LA + MC

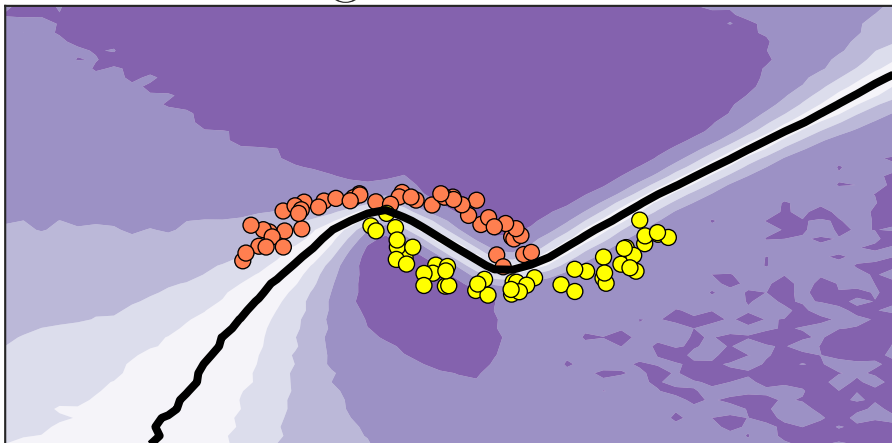

Kron.-LA + MC

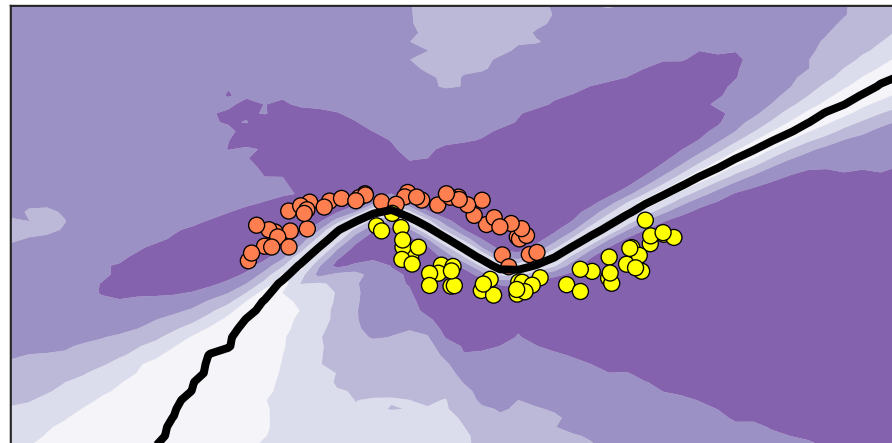

Full.-LA + MC

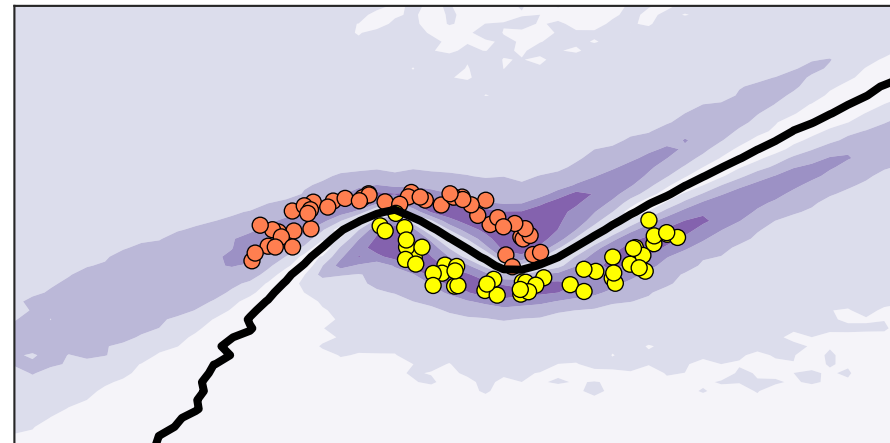

Diag.-LA + LB

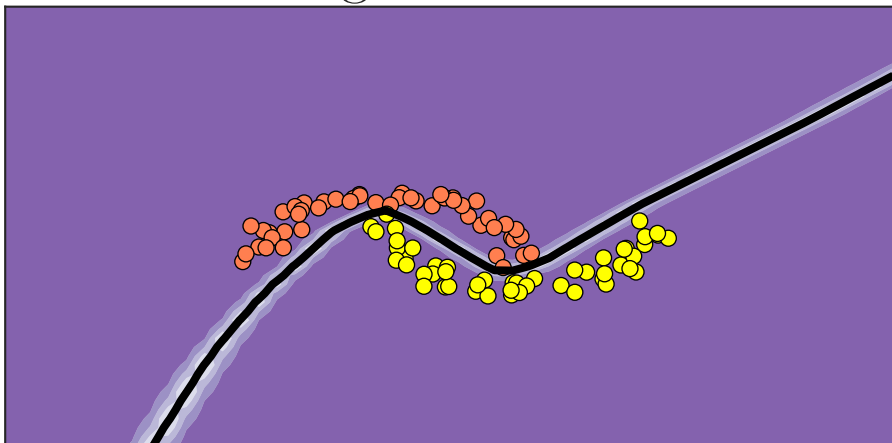

Kron.-LA + LB

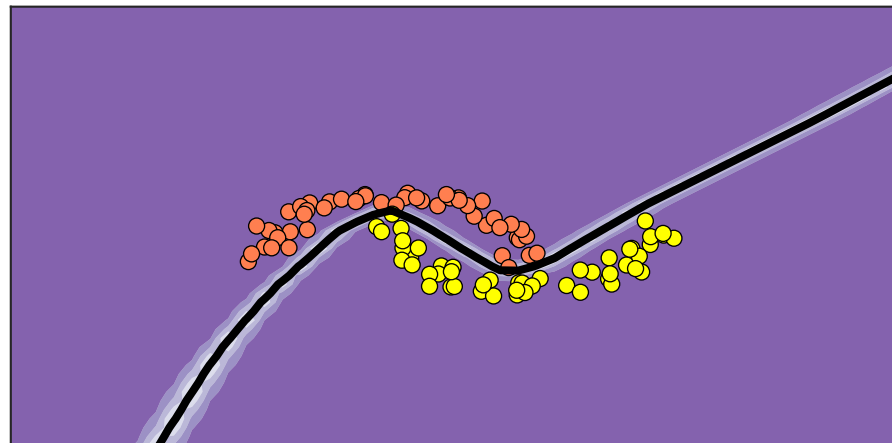

Full.-LA + LB

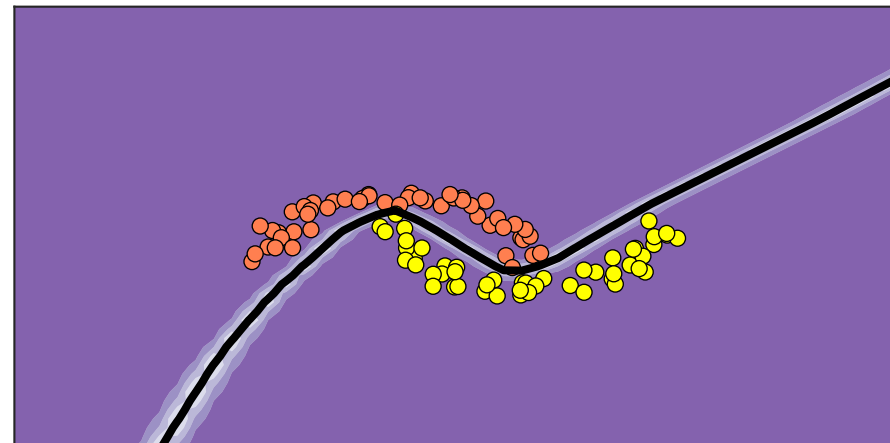

Diag.-LA + LB-norm

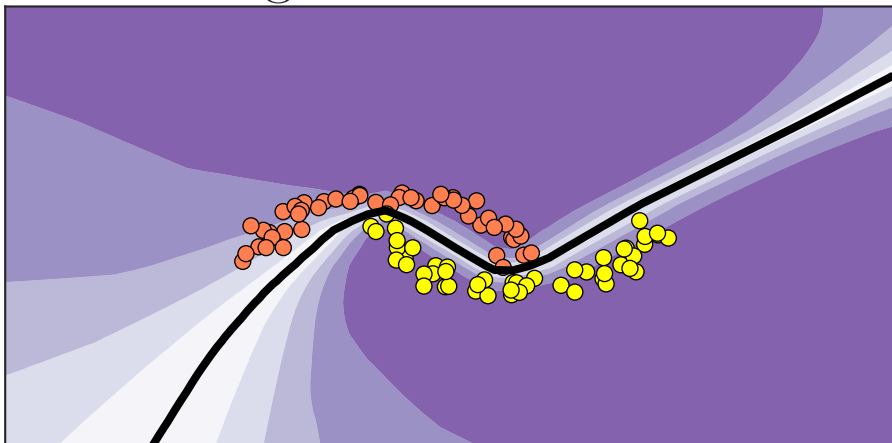

Diag.-LA + LB-norm

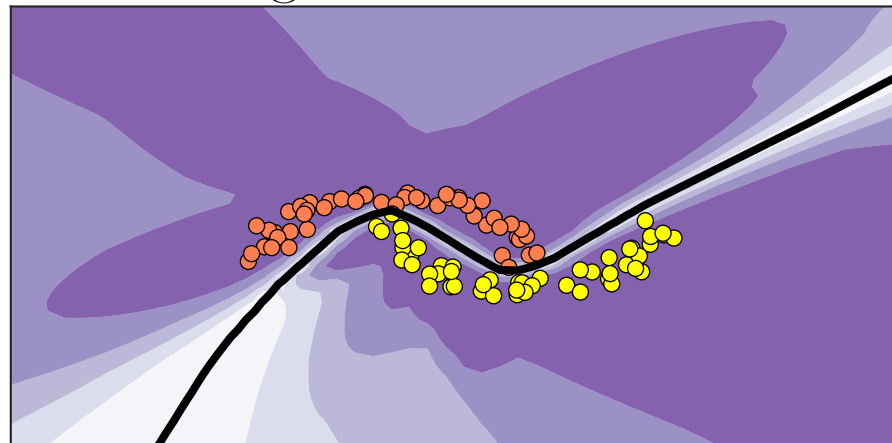

Diag.-LA + LB-norm

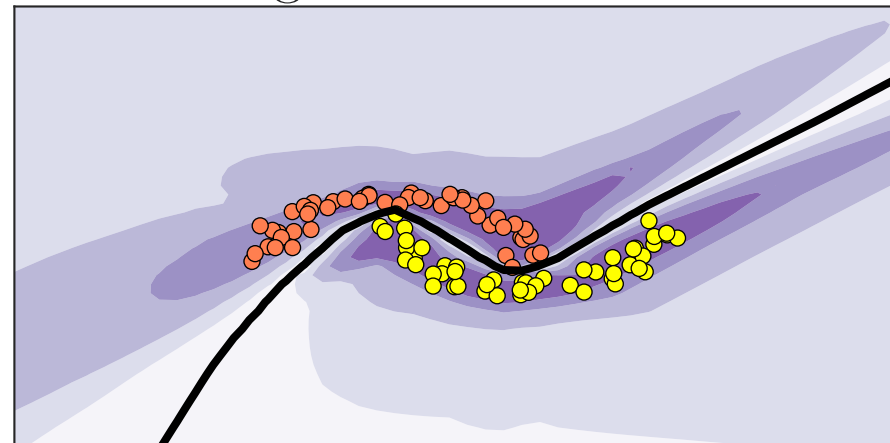

Supplement: supplementary_material [file attachment]
