# Supplementary material
Source: ML conference proceedings conference paper supplement (https://openreview.net/forum?id=H9MvL8o5gc)

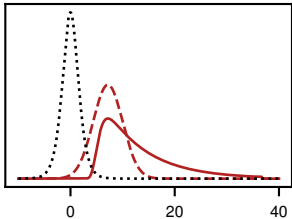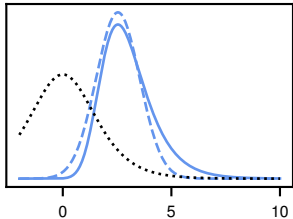

Supplement: supplementary_material [file attachment]

$X$

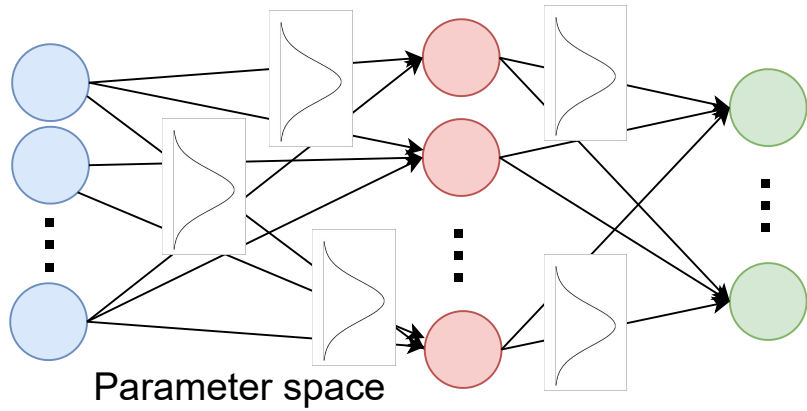

Logit  
space

Laplace  
Bridge

Output  
space  
(Dirichlet)

$\dots$   
 $p(y|x, D)$

Supplement: supplementary_material [file attachment]

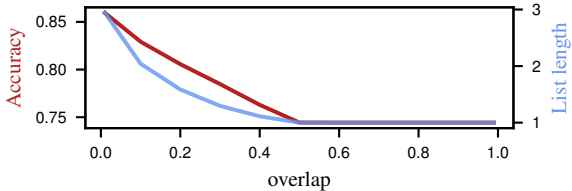

Supplement: supplementary_material [file attachment]

Before correction

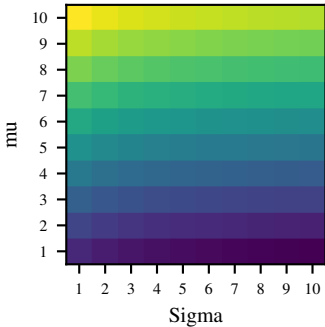

After correction

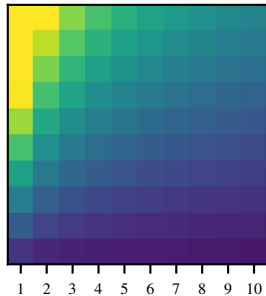

Supplement: supplementary_material [file attachment]

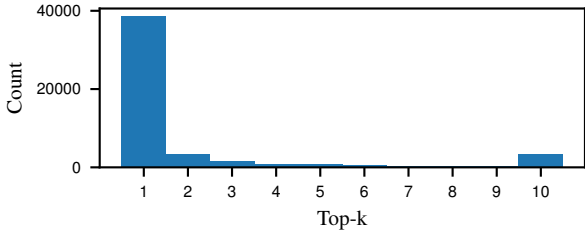

Supplement: supplementary_material [file attachment]

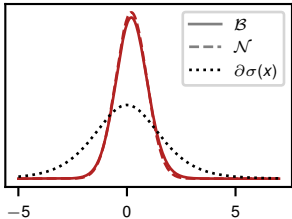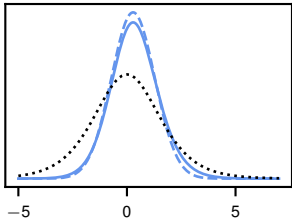

Supplement: supplementary_material [file attachment]

Laplace in standard basis

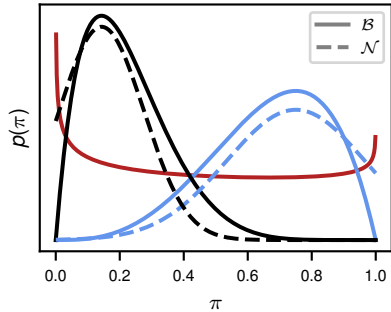

Laplace in logit basis

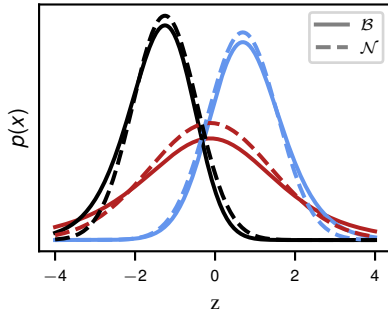

Back to standard basis

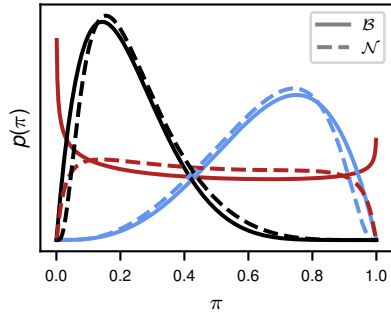

Supplement: supplementary_material [file attachment]

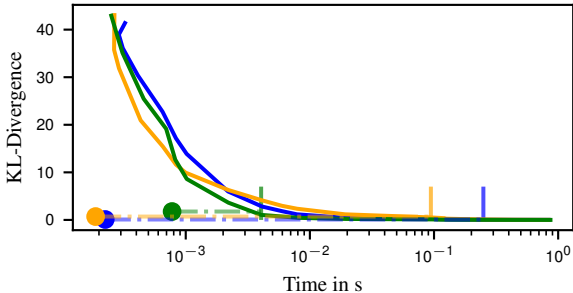

Supplement: supplementary_material [file attachment]

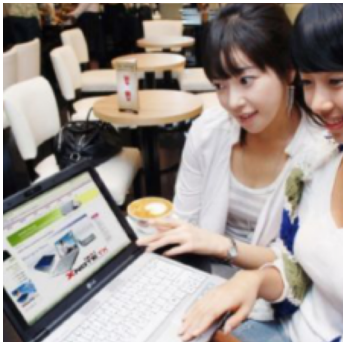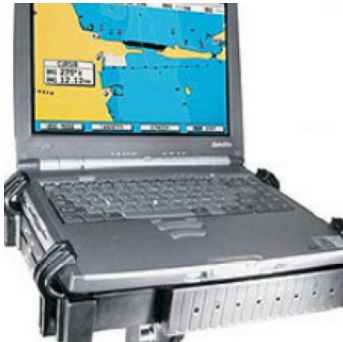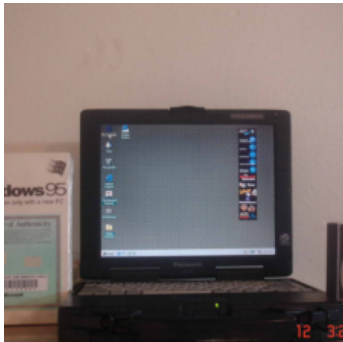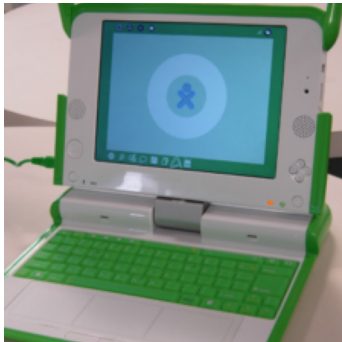

Supplement: supplementary_material [file attachment]

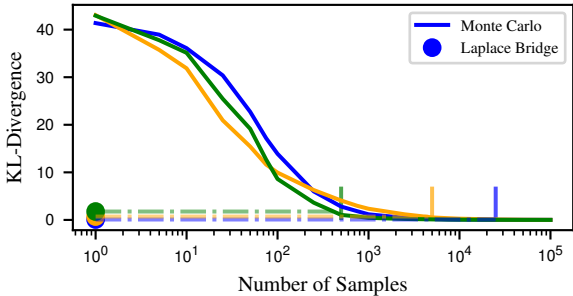

Supplement: supplementary_material [file attachment]

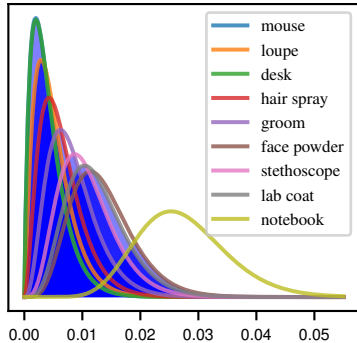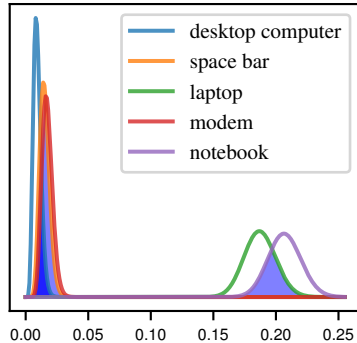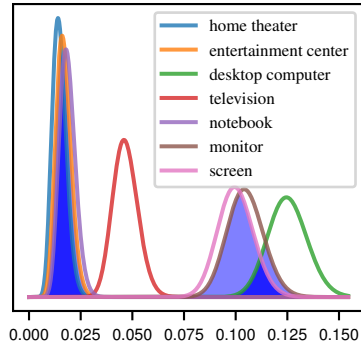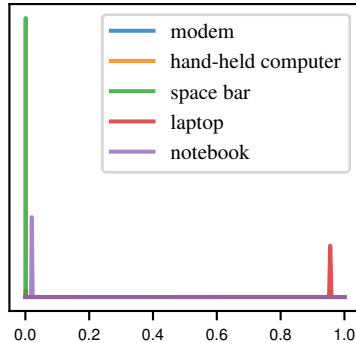

Supplement: supplementary_material [file attachment]
